# Supplementary material for: Identification of a novel MSI-related ceRNA network for predicting the prognosis and immunotherapy response of gastric cancer
Source: publisher site journal article supplement (doi:10.18632/aging.204794), 2023-06-12
Supplement: Supplementary file [file aging-v15i11-204794-supplementary-material-SD2.pdf]

## Supplementary Tables

**Supplementary Table 1. Data information in TCGA and GEO database.**

|                  | <b>TCGA overall (N=443)</b> |               | <b>GEO overall (N=681)</b> |
|------------------|-----------------------------|---------------|----------------------------|
| <b>Event</b>     |                             | <b>Fustat</b> |                            |
| Alive            | 247 (55.8%)                 | 0             | 350 (51.4%)                |
| Dead             | 159 (35.9%)                 | 1             | 331 (48.6%)                |
| Unknow           | 37 (8.4%)                   |               |                            |
| <b>Age</b>       |                             | <b>Age</b>    |                            |
| <=65             | 181 (40.9%)                 | <=65          | 384 (56.4%)                |
| >65              | 222 (50.1%)                 | >65           | 297 (43.6%)                |
| Unknow           | 40 (9.0%)                   |               |                            |
| <b>Gender</b>    |                             | <b>Gender</b> |                            |
| Female           | 150 (33.9%)                 | Female        | 224 (32.9%)                |
| Male             | 256 (57.8%)                 | Male          | 457 (67.1%)                |
| Unknow           | 37 (8.4%)                   |               |                            |
| <b>Grade</b>     |                             |               |                            |
| G1               | 10 (2.3%)                   |               |                            |
| G2               | 149 (33.6%)                 |               |                            |
| G3               | 240 (54.2%)                 |               |                            |
| Unknow           | 44 (9.9%)                   |               |                            |
| <b>Stage</b>     |                             |               |                            |
| Stage I          | 56 (12.6%)                  |               |                            |
| Stage II         | 118 (26.6%)                 |               |                            |
| Stage III        | 167 (37.7%)                 |               |                            |
| Stage IV         | 39 (8.8%)                   |               |                            |
| Unknow           | 63 (14.2%)                  |               |                            |
| <b>T</b>         |                             |               |                            |
| T1               | 23 (5.2%)                   |               |                            |
| T2               | 85 (19.2%)                  |               |                            |
| T3               | 185 (41.8%)                 |               |                            |
| T4               | 103 (23.3%)                 |               |                            |
| Unknow           | 47 (10.6%)                  |               |                            |
| <b>M</b>         |                             |               |                            |
| M0               | 361 (81.5%)                 |               |                            |
| M1               | 27 (6.1%)                   |               |                            |
| Unknow           | 55 (12.4%)                  |               |                            |
| <b>N</b>         |                             |               |                            |
| N0               | 122 (27.5%)                 |               |                            |
| N1               | 109 (24.6%)                 |               |                            |
| N2               | 80 (18.1%)                  |               |                            |
| N3               | 78 (17.6%)                  |               |                            |
| Unknow           | 54 (12.2%)                  |               |                            |
| <b>MSI</b>       |                             |               |                            |
| Stable           | 295(66.6%)                  |               |                            |
| Low              | 63(14.2%)                   |               |                            |
| High             | 85 (19.2%)                  |               |                            |
| <b>PD1_pos</b>   |                             |               |                            |
| 10               | 5 (1.1%)                    |               |                            |
| 4                | 2 (0.5%)                    |               |                            |
| 5                | 10 (2.3%)                   |               |                            |
| 6                | 63 (14.2%)                  |               |                            |
| 7                | 132 (29.8%)                 |               |                            |
| 8                | 146 (33.0%)                 |               |                            |
| 9                | 57 (12.9%)                  |               |                            |
| Unknow           | 28 (6.3%)                   |               |                            |
| <b>CTLA4_pos</b> |                             |               |                            |
| 10               | 23 (5.2%)                   |               |                            |
| 5                | 2 (0.5%)                    |               |                            |
| 6                | 26 (5.9%)                   |               |                            |
| 7                | 83 (18.7%)                  |               |                            |
| 8                | 157 (35.4%)                 |               |                            |
| 9                | 124 (28.0%)                 |               |                            |

|                      |             |
|----------------------|-------------|
| Unknow               | 28 (6.3%)   |
| <b>PDI_CTLA4_pos</b> |             |
| 10                   | 3 (0.7%)    |
| 3                    | 1 (0.2%)    |
| 4                    | 5 (1.1%)    |
| 5                    | 31 (7.0%)   |
| 6                    | 84 (19.0%)  |
| 7                    | 140 (31.6%) |
| 8                    | 101 (22.8%) |
| 9                    | 50 (11.3%)  |
| Unknow               | 28 (6.3%)   |

---
